# Supplementary material for: Reexamination of formic acid decomposition on the Pt(111) surface both in the absence and in the presence of water, from periodic DFT calculations
Source: Royal Society of Chemistry journal article supplement (doi:10.1039/c5cy00159e), 2015-01-01
Supplement: c5cy00159e1.pdf [file c5cy00159e1.pdf]

## Supplementary Information

### **Reexamination of formic acid decomposition on thePt(111) surface both in the absence and in the presence of water, from periodic DFT calculations**

Yuanyuan Qi, Jingjing Li, Dongju Zhang,\* and Chengbu Liu

*Key Lab of Colloid and Interface Chemistry, Ministry of Education, Institute of  
Theoretical Chemistry, Shandong University, Jinan, 250100, P. R. China*

Corresponding author:

Dr & Professor Dongju Zhang

E-mail: zhangdj@sdu.edu.cn

Phone: +86-531-88365833

Fax: +86-531-88564464

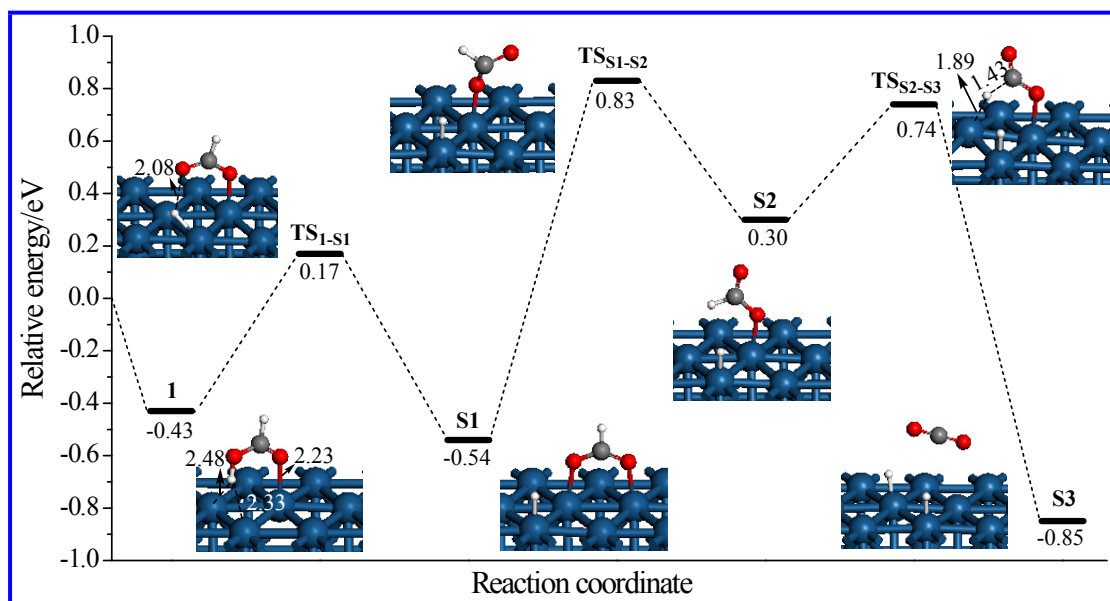

**Fig. S1** Relative energy profile and geometries of key intermediates and transition states identified for the decomposition of monomeric formic acid to CO<sub>2</sub> along with the formate pathway in the gas phase on Pt(111). The sum energy of *trans*-HCOOH and the clean Pt(111) surface is taken as the zero energy reference. The C, H, O and Pt atoms are shown in gray, white, red and dark blue, respectively. The distances are in Å.

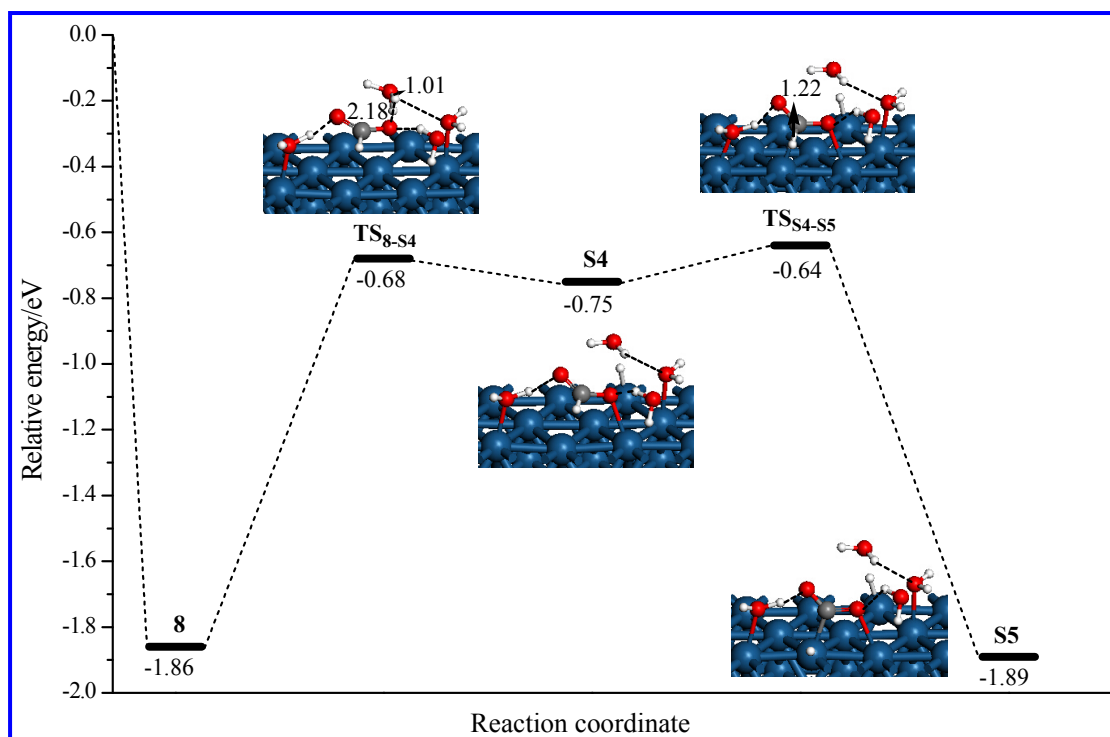

**Fig. S2** Relative energy profile and geometries of key intermediates and transition states identified for the decomposition of monomeric formic acid to CO<sub>2</sub> along with the formate pathway with the presence of water on Pt(111). The sum energy of *trans*-HCOOH, four water molecules and the clean Pt(111) surface is taken as the zero energy reference. The C, H, O and Pt atoms are shown in gray, white, red and dark blue, respectively. The distances are in Å.

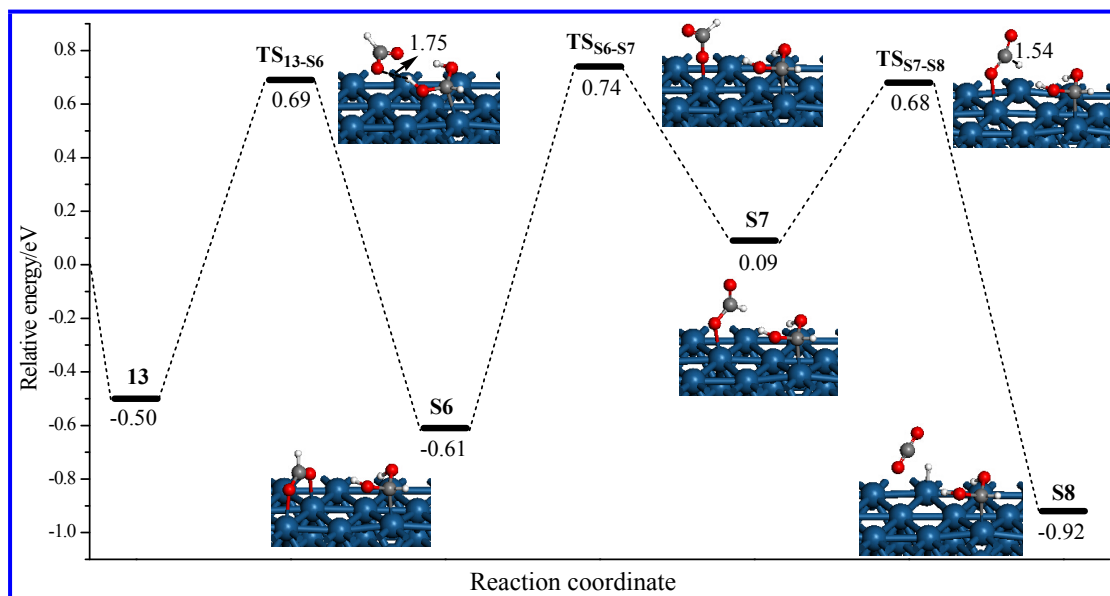

**Fig. S3** Relative energy profile and geometries of key intermediates and transition states identified for the decomposition of dimeric formic acid to CO<sub>2</sub> along with the formate pathway in the gas phase on Pt(111). The sum energy of two *trans*-HCOOH molecules and the clean Pt(111) surface is taken as the zero energy reference. The C, H, O and Pt atoms are shown in gray, white, red and dark blue, respectively. The distances are in Å.

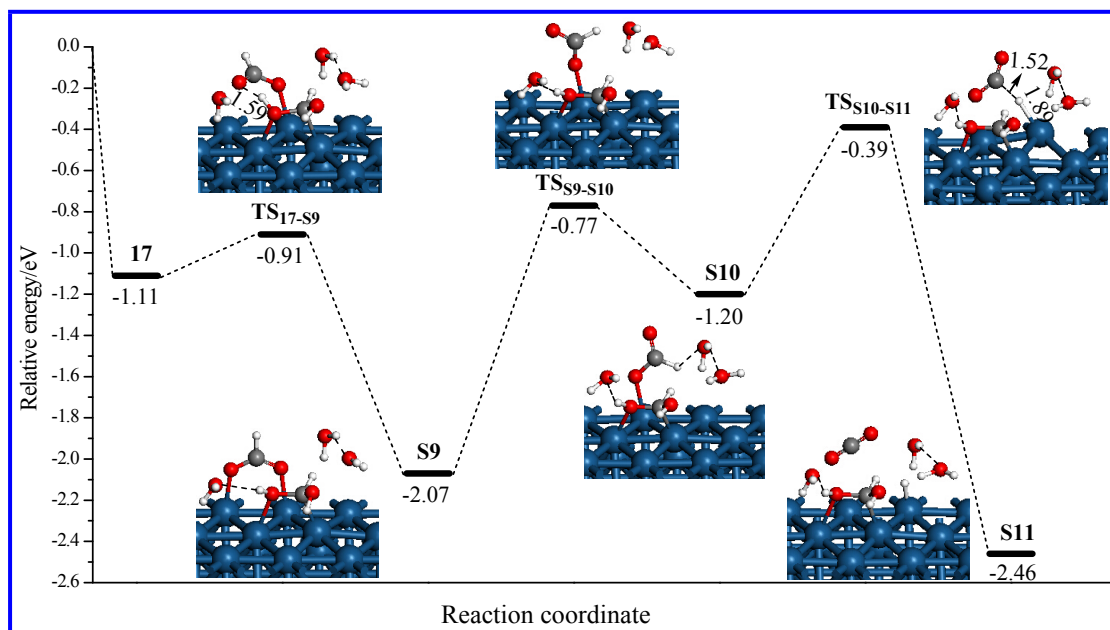

**Fig. S4** Relative energy profile and geometries of key intermediates and transition states identified for the decomposition of dimeric formic acid to CO<sub>2</sub> along with the formate pathway with the presence of water on Pt(111). The sum energy of *trans*-HCOOH, three water molecules and the clean Pt(111) surface is taken as the zero energy reference. The C, H, O and Pt atoms are shown in gray, white, red and dark blue, respectively. The distances are in Å.

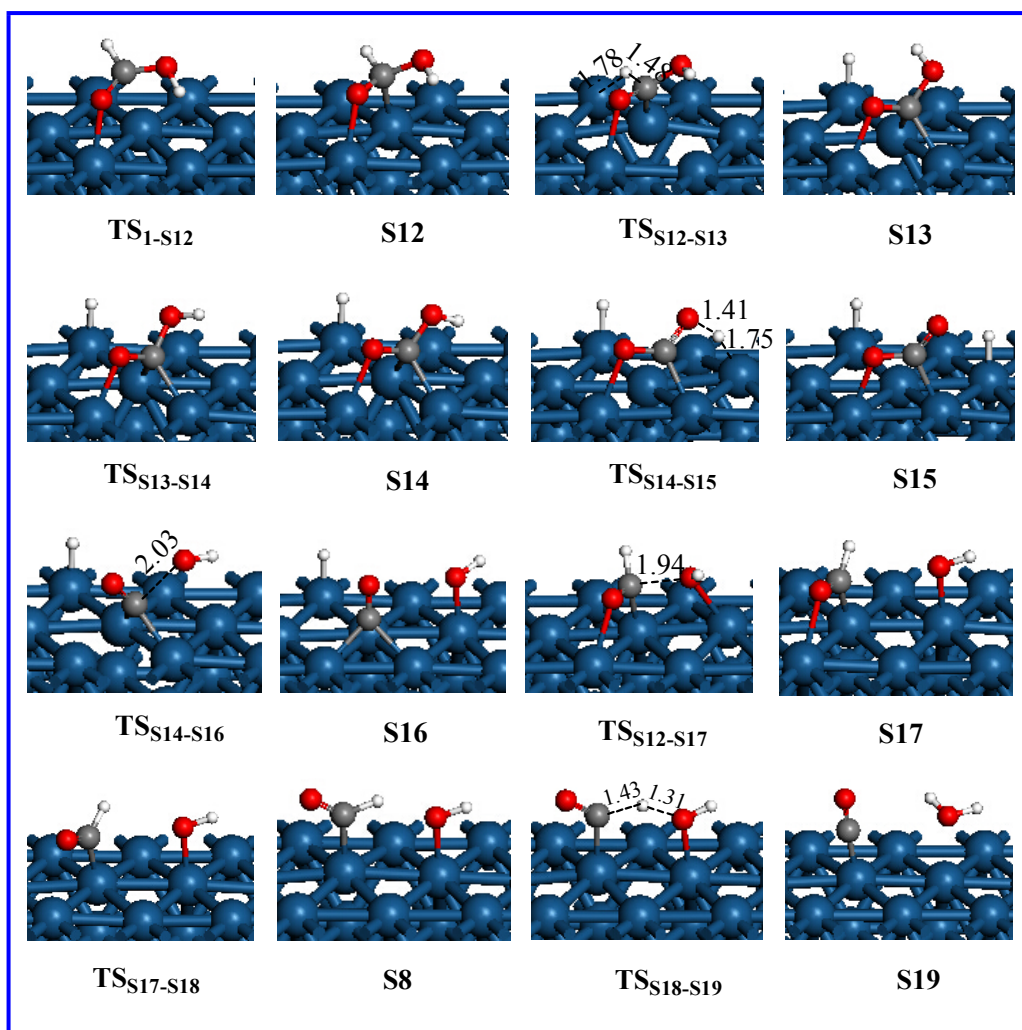

**Fig. S5** Geometries of key intermediates and transition states identified for the decomposition of monomer of *trans*-formic acid in the gas phase on Pt(111). The C, H, O and Pt atoms are shown in gray, white, red and dark blue, respectively. The distances are in Å.

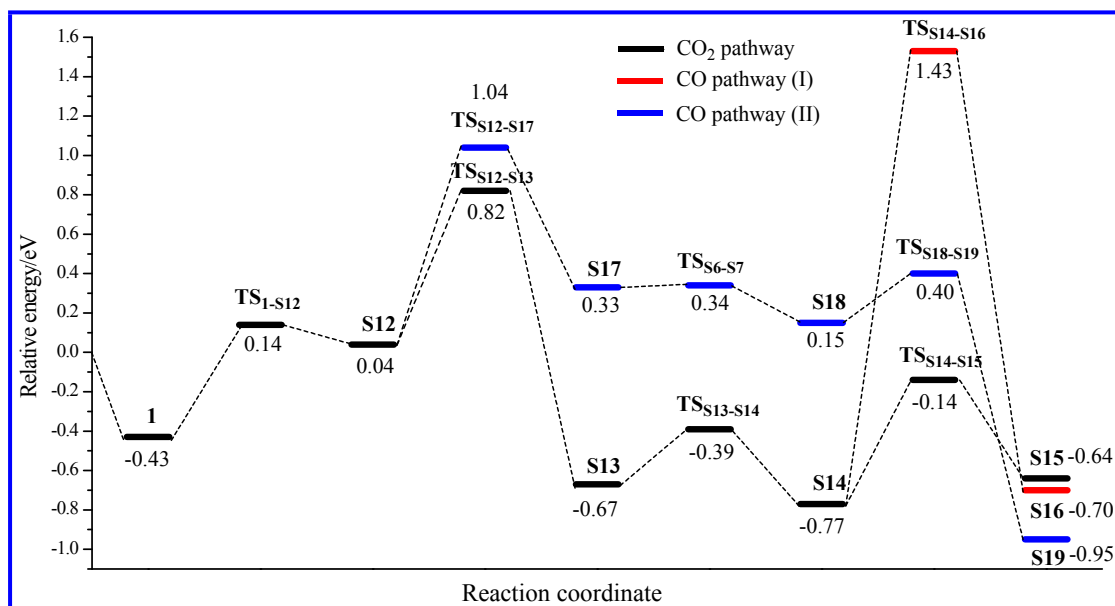

**Fig. S6** Relative energy profiles for the decomposition of monomeric *trans*-HCOOH to CO<sub>2</sub> and CO in the gas phase. The sum energy of *trans*-HCOOH and the clean Pt(111) surface is taken as the zero energy reference. CO pathway (I) donates the pathway that involving the COOH intermediate, and CO pathway (II) donates the pathway that involving the HCO intermediate.

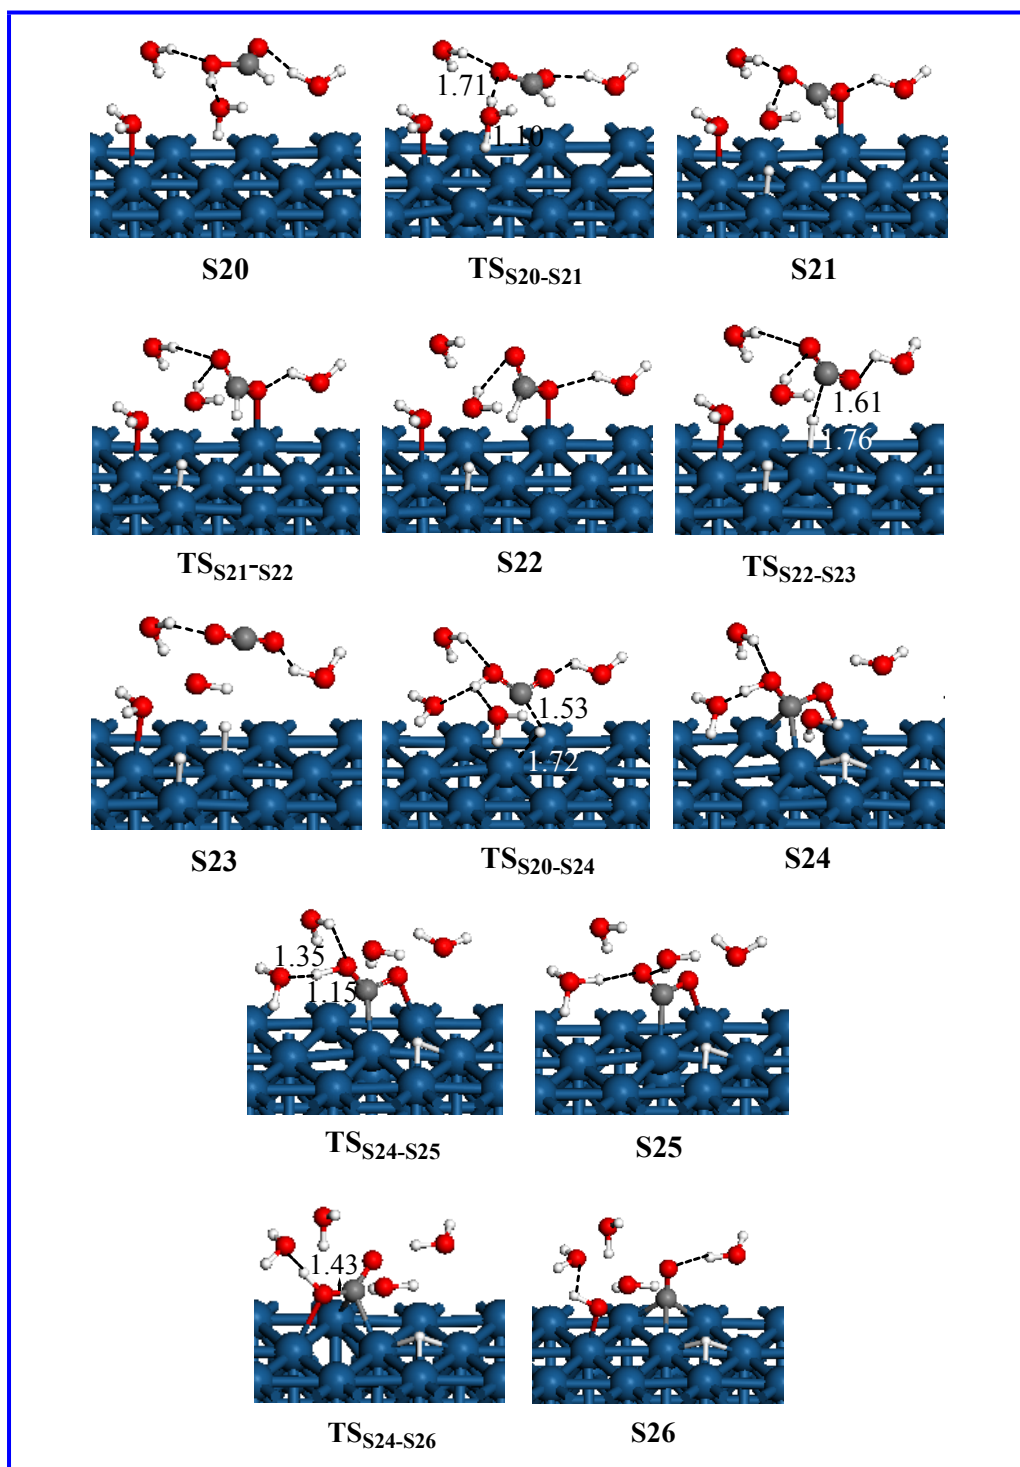

**Fig. S7** Geometries of key intermediates and transition states identified for the decomposition of monomeric *cis*-formic acid with the presence of water on Pt(111). The C, H, O and Pt atoms are shown in gray, white, red and dark blue, respectively. The distances are in Å.



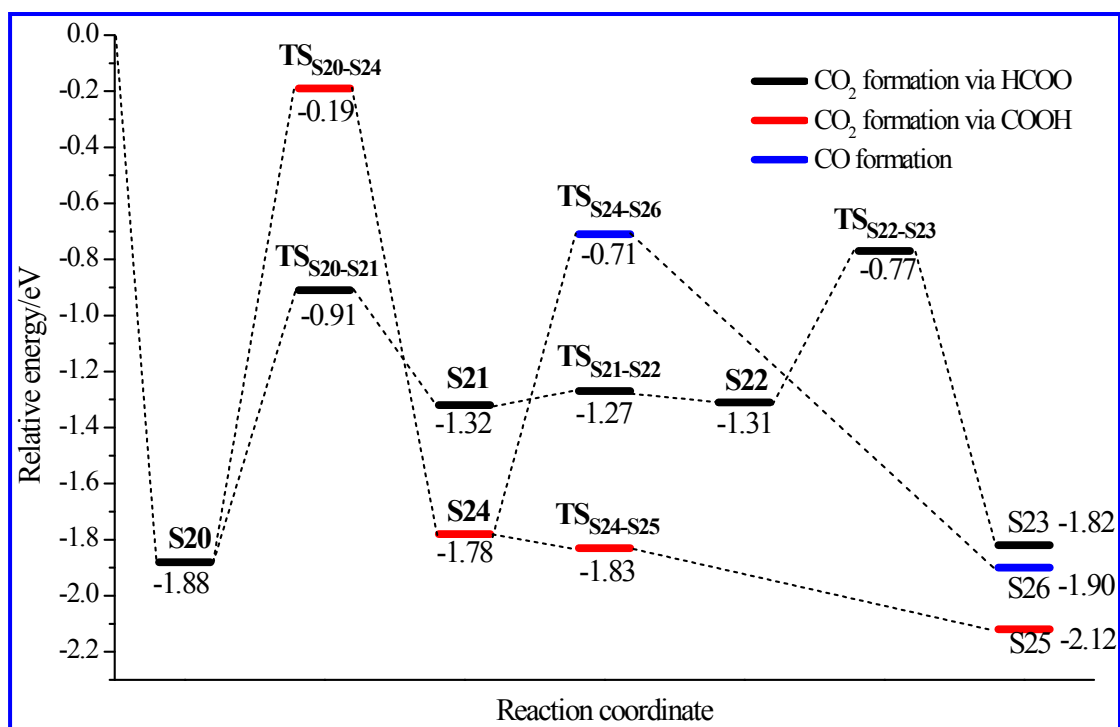

**Fig. S8** Relative energy profiles for the decomposition of monomeric *cis*-HCOOH to CO<sub>2</sub> and CO with the presence of water on Pt(111). The sum energy of *cis*-HCOOH, four water molecules and the clean Pt(111) surface is taken as the zero energy reference.

Table S1 Calculated activation barriers ( $\Delta E$ ) and reaction energies ( $\Delta H$ ) (in eV) of the decomposition of formic acid via the COOH intermediate from the present and previous works

| Adsorbates                             |                      | C-H bond cleavage |                    |                                                             |                                                                 | O-H bond cleavage  |                    |                                                                                 |                    | C-OH bond cleavage                                                         |                                                                                                                                                                            |                                 |                    |
|----------------------------------------|----------------------|-------------------|--------------------|-------------------------------------------------------------|-----------------------------------------------------------------|--------------------|--------------------|---------------------------------------------------------------------------------|--------------------|----------------------------------------------------------------------------|----------------------------------------------------------------------------------------------------------------------------------------------------------------------------|---------------------------------|--------------------|
|                                        |                      | Our work          |                    | Literatures                                                 |                                                                 | Our work           |                    | Literatures                                                                     |                    | Our work                                                                   |                                                                                                                                                                            | Literatures                     |                    |
|                                        |                      | $\Delta E$        | $\Delta H$         | $\Delta E$                                                  | $\Delta H$                                                      | $\Delta E$         | $\Delta H$         | $\Delta E$                                                                      | $\Delta H$         | $\Delta E$                                                                 | $\Delta H$                                                                                                                                                                 | $\Delta E$                      | $\Delta H$         |
| <i>cis</i> -HCOOH                      | CO <sub>2</sub> path | 0.50 <sup>a</sup> | -0.84 <sup>a</sup> | 0.50 <sup>32</sup>                                          | -                                                               | 0.73 <sup>a</sup>  | 0.16 <sup>a</sup>  | 1.02 <sup>48</sup>                                                              | -                  | -                                                                          | -                                                                                                                                                                          | -                               | -                  |
|                                        | CO path              | 0.14 <sup>a</sup> | 1.11 <sup>a</sup>  | -                                                           | -                                                               | -                  | -                  | -                                                                               | -                  | 0.88 <sup>a</sup>                                                          | 0.20 <sup>a</sup>                                                                                                                                                          | over 1.00 <sup>32</sup>         | -                  |
| <i>trans</i> -HCOOH                    | CO <sub>2</sub> path | 0.78 <sup>b</sup> | 0.71 <sup>b</sup>  | 1.58 <sup>20</sup> 1.83 <sup>20</sup><br>1.97 <sup>36</sup> | -0.33 <sup>20</sup> -0.23 <sup>20</sup> -<br>0.36 <sup>36</sup> | 0.63 <sup>b</sup>  | 0.13 <sup>b</sup>  | 0.90 <sup>20</sup> -0.02 <sup>20</sup><br>0.94 <sup>20</sup> 0.02 <sup>20</sup> | -                  | -                                                                          | -                                                                                                                                                                          | -                               | -                  |
|                                        | CO path              | 0.25 <sup>b</sup> | -1.10 <sup>b</sup> | 1.58 <sup>20</sup> 1.83 <sup>20</sup><br>1.97 <sup>36</sup> | -0.33 <sup>20</sup> -0.23 <sup>20</sup> -<br>0.36 <sup>36</sup> | -                  | -                  | -                                                                               | -                  | 1.00 <sup>b</sup> 0.29 <sup>b</sup><br>2.20 <sup>b</sup> 0.07 <sup>b</sup> | 1.53 <sup>20</sup>                                                                                                                                                         | -0.22 <sup>20</sup>             |                    |
| <i>cis</i> -HCOOH +4H <sub>2</sub> O   | CO <sub>2</sub> path | 1.69 <sup>c</sup> | 0.10 <sup>c</sup>  | -                                                           | -                                                               | -0.05 <sup>c</sup> | -0.34 <sup>c</sup> | 0.48 <sup>7</sup>                                                               | -0.25 <sup>7</sup> | -                                                                          | -                                                                                                                                                                          | -                               | -                  |
|                                        | CO path              | 1.69 <sup>c</sup> | 0.10 <sup>c</sup>  | -                                                           | -                                                               | -                  | -                  | -                                                                               | -                  | 0.57 <sup>c</sup>                                                          | -0.12 <sup>c</sup>                                                                                                                                                         | -                               | -                  |
| <i>trans</i> -HCOOH +4H <sub>2</sub> O | CO <sub>2</sub> path | 0.26 <sup>d</sup> | -1.01 <sup>d</sup> | 1.67 <sup>20</sup> 0.45 <sup>19</sup>                       | -0.32 <sup>7</sup>                                              | 0.35 <sup>d</sup>  | -0.32 <sup>d</sup> | 1.05 <sup>7</sup> 0.00 <sup>7</sup> -<br>2.46 <sup>20</sup> 0.20 <sup>20</sup>  | -                  | -                                                                          | -                                                                                                                                                                          | -                               | -                  |
|                                        | CO path              | 0.26 <sup>d</sup> | -1.01 <sup>d</sup> | 1.67 <sup>20</sup> 0.45 <sup>19</sup>                       | -0.32 <sup>7</sup>                                              | -                  | -                  | -                                                                               | -                  | 0.19 <sup>d</sup> -0.50 <sup>d</sup>                                       | 1.80 <sup>7</sup> 3.20 <sup>20</sup> <sup>g</sup> -0.73 <sup>7</sup> -1.05 <sup>20</sup> -<br>1.39 <sup>20</sup> 2.74 <sup>20</sup> 0.58 <sup>20</sup> -0.53 <sup>20</sup> | -                               |                    |
| 2HCOOH                                 | CO <sub>2</sub> path | 0.26 <sup>e</sup> | -0.51 <sup>e</sup> | -                                                           | -                                                               | 0.69 <sup>e</sup>  | -0.76 <sup>e</sup> | -                                                                               | -                  | -                                                                          | -                                                                                                                                                                          | -                               | -                  |
|                                        | CO path              | 0.26 <sup>e</sup> | -0.51 <sup>e</sup> | -                                                           | -                                                               | -                  | -                  | -                                                                               | -                  | 0.45 <sup>e</sup>                                                          | 0.18 <sup>e</sup>                                                                                                                                                          | -                               | -                  |
| 2HCOOH +3H <sub>2</sub> O              | CO <sub>2</sub> path | 0.42 <sup>f</sup> | -1.05 <sup>f</sup> | -                                                           | -                                                               | 0.15 <sup>f</sup>  | -0.17 <sup>f</sup> | -                                                                               | -                  | -                                                                          | -                                                                                                                                                                          | -                               | -                  |
|                                        | CO path              | 0.42 <sup>f</sup> | -1.05 <sup>f</sup> | -                                                           | -                                                               | -                  | -                  | -                                                                               | -                  | 0.11 <sup>f</sup>                                                          | -0.33 <sup>f</sup>                                                                                                                                                         | 0.66 <sup>27</sup> <sup>h</sup> | 0.51 <sup>27</sup> |

<sup>a, b, c, d, e, f</sup>The activation energies and reaction energies obtained from Figs. 2, S6, S8, 4, 6, and 8, respectively. <sup>g</sup>The barrier involved in a synergetic process with the simultaneous cleavage of C-H and C-OH bond. <sup>h</sup>The barrier involved in a synergetic process with the simultaneous formation of CO<sub>2</sub> and CO.

Table S2 Calculated activation barriers ( $E_{\text{act}}$ ) and reaction energies ( $\Delta H$ ) (in eV) of the decomposition of formic acid initiated from the O-H scission

| Adsorbates                                 | O-H bond cleavage |                    | Formate adjustment <sup>a</sup> |                    |                    |                    | C-H bond cleavage |                    |                                          |                                            |
|--------------------------------------------|-------------------|--------------------|---------------------------------|--------------------|--------------------|--------------------|-------------------|--------------------|------------------------------------------|--------------------------------------------|
|                                            | Our work          |                    | Our work                        |                    | Literatures        |                    | Our work          |                    | Literatures                              |                                            |
|                                            | $\Delta E$        | $\Delta H$         | $\Delta E$                      | $\Delta H$         | $\Delta E$         | $\Delta H$         | $\Delta E$        | $\Delta H$         | $\Delta E$                               | $\Delta H$                                 |
| <i>trans</i> -HCOOH                        | 0.60 <sup>b</sup> | -0.11 <sup>b</sup> | 1.37 <sup>b</sup>               | 0.84 <sup>b</sup>  | 1.16 <sup>20</sup> | 0.55 <sup>20</sup> | 0.44 <sup>b</sup> | -1.15 <sup>b</sup> | -                                        | -                                          |
| <i>trans</i> -HCOOH<br>+ 4H <sub>2</sub> O | 1.18 <sup>c</sup> | 1.11 <sup>c</sup>  | -                               | -                  | 1.27 <sup>20</sup> | 0.85 <sup>20</sup> | 0.11 <sup>c</sup> | -1.14 <sup>c</sup> | 0.58 <sup>20</sup><br>0.92 <sup>20</sup> | -0.59 <sup>20</sup><br>-0.68 <sup>20</sup> |
| <i>cis</i> -HCOOH<br>+ 4H <sub>2</sub> O   | 0.97 <sup>d</sup> | 0.56 <sup>d</sup>  | 0.05 <sup>d</sup>               | 0.01 <sup>d</sup>  | -                  | -                  | 0.54 <sup>d</sup> | -0.51 <sup>d</sup> | -                                        | -                                          |
| 2HCOOH                                     | 1.19 <sup>e</sup> | -0.11 <sup>e</sup> | 1.35 <sup>e</sup>               | 0.70 <sup>e</sup>  | -                  | -                  | 0.59 <sup>e</sup> | -1.01 <sup>e</sup> | -                                        | -                                          |
| 2HCOOH<br>+ 3H <sub>2</sub> O              | 0.42 <sup>f</sup> | -1.05 <sup>f</sup> | 0.15 <sup>f</sup>               | -0.17 <sup>f</sup> | -                  | -                  | 0.81 <sup>f</sup> | -1.26 <sup>f</sup> | -                                        | -                                          |

<sup>a</sup>Rotation or transformation of formate from bidentate form to monodentate one. <sup>b, c, d, e, f</sup>The activation barriers and reaction energies obtained from Figs. S1, S2, S8, S3, and S4, respectively.
